# Supplementary material for: NlpD links cell wall remodeling and outer membrane invagination during cytokinesis in Escherichia coli
Source: PubMed Central journal article supplement (PMC5533458; doi:10.1371/journal.pgen.1006888), 2017-07-14
Supplement: pgen.1006888.s009.pdf [file pgen.1006888.s009.pdf]

**S1 Table. Strains used in this study**

| <b>Strain</b> | <b>Genotype<sup>a</sup></b>                                                                      | <b>Source/Reference<sup>b</sup></b> |
|---------------|--------------------------------------------------------------------------------------------------|-------------------------------------|
| DH5α          | <i>F– hsdR17 deoR recA1 endA1 phoA supE44 thi-1 gyrA96 relA1 Δ(lacZYA-argF)U169 ϕ80dlacZΔM15</i> | Gibco BRL                           |
| BL21(λDE3)    | <i>ompT rB– mB– (PlacUV5::T7gene1)</i>                                                           | Novagen                             |
| MG1655        | <i>rph-1 ilvG rfb-50</i>                                                                         | [1]                                 |
| AAY22         | TB28 <i>ΔamiC::frt ΔyraP::Kan<sup>R</sup></i>                                                    | P1(MT129) x TB143                   |
| MT46          | TB28 <i>ΔSSnlpD::Kan<sup>R</sup></i>                                                             | P1(λRed) x TB28                     |
| MT47          | TB28 <i>ΔSSnlpD::frt</i>                                                                         | MT46/pCP20                          |
| MT50          | TB28 <i>ΔSSnlpD::frt ΔenvC::Kan<sup>R</sup></i>                                                  | P1(TB134) x MT47                    |
| MT51          | TB28 <i>ΔtolQ-pal::Kan<sup>R</sup></i>                                                           | P1(λRed) x TB28                     |
| MT53          | TB28 <i>ΔSSnlpD::frt ΔtolQ-pal::Kan<sup>R</sup></i>                                              | P1(λRed) x MT47                     |
| MT55          | TB28 <i>ΔenvC::frt ΔtolQ-pal::Kan<sup>R</sup></i>                                                | P1(λRed) x TB140                    |
| MT56          | TB28 <i>ΔamiC::frt ΔtolQ-pal::Kan<sup>R</sup></i>                                                | P1(MT51) x TB143                    |
| MT92          | TB28 <i>ΔSSnlpD::frt ΔtolQ-pal::frt</i>                                                          | MT53/pCP20                          |
| MT96          | TB28 <i>ΔSSnlpD::frt ΔtolQ-pal::frt ΔenvC::Kan<sup>R</sup></i>                                   | P1(TB134) x MT92                    |
| MT121         | MG1655 <i>ΔSSnlpD::Kan<sup>R</sup></i>                                                           | P1(MT46) x MG1655                   |
| MT122         | MG1655 <i>ΔSSnlpD::frt</i>                                                                       | MT121/pCP20                         |
| MT123         | MG1655 <i>ΔSSnlpD::frt ΔamiC::Kan<sup>R</sup></i>                                                | P1(TB137) x MT122                   |
| MT129         | TB10 <i>ΔyraP::Kan<sup>R</sup></i>                                                               | λRed                                |
| MT135         | TB28 <i>ΔenvC::frt ΔyraP::Kan<sup>R</sup></i>                                                    | P1(MT129) x TB140                   |
| MT140         | TB28 <i>ΔyraP::Kan<sup>R</sup></i>                                                               | P1(MT129) x TB28                    |
| MT141         | TB28 <i>ΔSSnlpD::frt ΔyraP::Kan<sup>R</sup></i>                                                  | P1(MT129) x MT47                    |
| MT147         | TB28 <i>ΔSSnlpD::frt ΔtolQ-pal::frt ΔyraP::Kan<sup>R</sup></i>                                   | P1(MT129) x MT92                    |
| MT149         | TB28 <i>ΔamiC::frt ΔtolQ-pal::Kan<sup>R</sup></i>                                                | P1(MT51) x TB143                    |
| MT150         | TB28 <i>ΔamiC::frt ΔyraP::Kan<sup>R</sup></i>                                                    | P1(MT129) x TB143                   |
| MT174         | TB28 <i>ΔamiC::frt ΔtolQ-pal::frt</i>                                                            | MT56/pCP20                          |

| Strain | Genotype <sup>a</sup>                                           | Source/Reference <sup>b</sup> |
|--------|-----------------------------------------------------------------|-------------------------------|
| MT176  | TB28 $\Delta^{SS}nlpD::frr \Delta amiC::Kan^R$                  | P1(TB137) x MT47              |
| MT177  | TB28 $\Delta^{SS}nlpD::frr \Delta yraP::frr$                    | MT141/pCP20                   |
| MT178  | TB28 $\Delta amiC::frr \Delta tolQ-pal::frr \Delta yraP::Kan^R$ | P1(MT129) x MT174             |
| MT179  | TB28 $\Delta^{SS}nlpD::frr \Delta yraP::frr \Delta envC::Kan^R$ | P1(TB134) x MT177             |
| TB10   | MG1655 $\lambda\Delta cro-bio nad::Tn10$                        | [2]                           |
| TB28   | MG1655 $\Delta laclZYA::frr$                                    | [3]                           |
| TB134  | TB28 $\Delta envC::Kan^R$                                       | [4]                           |
| TB137  | TB28 $\Delta amiC::Kan^R$                                       | [4]                           |
| TB140  | TB28 $\Delta envC::frr$                                         | [4]                           |
| TB143  | TB28 $\Delta amiC::frr$                                         | [5]                           |

<sup>a</sup> The Kan<sup>R</sup> cassette is flanked by *frr* sites for removal by FLP recombinase. An *frr* scar remains following removal of the cassette using FLP recombinase expressed from pCP20.

<sup>b</sup> Strain constructions by P1 transduction are described using the shorthand: P1(donor) x recipient. Transductants were selected on LB Kan, LB Tet, or LB Cm plates where appropriate.  $\lambda$ Red indicates strains constructed by recombineering (see Experimental Procedures for details). Strains resulting from the removal of a drug resistance cassette using pCP20 are indicated as: Parental strain/pCP20.
