# Supplementary material for: NlpD links cell wall remodeling and outer membrane invagination during cytokinesis in Escherichia coli
Source: PubMed Central journal article supplement (PMC5533458; doi:10.1371/journal.pgen.1006888), 2017-07-14
Supplement: pgen.1006888.s010.pdf [file pgen.1006888.s010.pdf]

**S2 Table. Plasmids used in this study**

| Plasmid | Genotype <sup>a</sup>                                                                            | Origin     | Source or Reference |
|---------|--------------------------------------------------------------------------------------------------|------------|---------------------|
| pBAD24  | <i>bla araC P<sub>ara</sub>::empty</i>                                                           | pBR/ColE1  | [6]                 |
| pINT-ts | <i>bla repA(ts) cl857(ts) P<sub>λR</sub>::int(λ)</i>                                             | R6K        | [7]                 |
| pKD46   | <i>bla repA101(ts) araC P<sub>ara</sub>::γ-β-exo</i>                                             | pSC101     | [8]                 |
| pMT12   | <i>attHK022 tetA tetR lacI P<sub>lac</sub>::nlpD<sup>(S27D)</sup></i>                            | R6K        | This study          |
| pMT20   | <i>attHK022 tetA tetR lacI P<sub>lac</sub>::nlpD<sup>(1-379)</sup></i>                           | R6K        | [9]                 |
| pMT21   | <i>attHK022 tetA tetR lacI P<sub>lac</sub>::nlpD<sup>(S27D)</sup>-mCherry</i>                    | R6K        | This study          |
| pMT94   | <i>cat lacI P<sub>lac</sub>::nativeRBS_ybgC_tolQRA</i>                                           | pACYC/p15A | This study          |
| pMT101  | <i>attHK022 tetA tetR lacI P<sub>lac</sub>::nlpD<sup>(1-189)</sup>-mCherry</i>                   | R6K        | This study          |
| pMT102  | <i>attHK022 tetA tetR lacI P<sub>lac</sub>::nlpD<sup>(1-189)</sup></i>                           | R6K        | This study          |
| pMT103  | <i>attHK022 tetA tetR lacI P<sub>lac</sub>::nlpD<sup>(1-115)</sup>-mCherry</i>                   | R6K        | This study          |
| pMT104  | <i>attHK022 tetA tetR lacI P<sub>lac</sub>::nlpD<sup>(1-115)</sup></i>                           | R6K        | This study          |
| pMT121  | <i>attHK022 tetA tetR lacI P<sub>lac</sub>::<i>ssdsbA-nlpD</i><sup>(27-379)</sup></i>            | R6K        | This study          |
| pMT147  | <i>attHK022 tetA tetR lacI P<sub>lac</sub>::<i>ssdsbA-nlpD</i><sup>(27-379)</sup>-mCherry</i>    | R6K        | This study          |
| pMT149  | <i>attHK022 tetA tetR lacI P<sub>lac</sub>::nlpD<sup>(1-30)</sup>-mCherry</i>                    | R6K        | This study          |
| pMT178  | <i>attHK022 tetA tetR lacI P<sub>lac</sub>::<i>ssdsbA-nlpD</i><sup>(102-175)</sup>-mCherry</i>   | R6K        | This study          |
| pMT179  | <i>attHK022 tetA tetR lacI P<sub>lac</sub>::<i>ssdsbA-nlpD</i><sup>(250-379)</sup></i>           | R6K        | This study          |
| pMT180  | <i>attHK022 tetA tetR lacI P<sub>lac</sub>::<i>ssdsbA-nlpD</i><sup>(250-379)</sup>-mCherry</i>   | R6K        | This study          |
| pMT181  | <i>attHK022 tetA tetR lacI P<sub>lac</sub>::<i>ssdsbA-nlpD</i><sup>(189-379)</sup></i>           | R6K        | This study          |
| pMT182  | <i>attHK022 tetA tetR lacI P<sub>lac</sub>::<i>ssdsbA-nlpD</i><sup>(189-379)</sup>-mCherry</i>   | R6K        | This study          |
| pMT187  | <i>aadA repA(ts) lacI<sup>q</sup> P<sub>lac</sub>::envC-LE Scel cl857 P<sub>λR</sub>::i-scel</i> | pSC101     | This study          |
| pMT196  | <i>attλ cat lacI P<sub>lac</sub>::yraP<sup>(1-191)</sup></i>                                     | R6K        | This study          |
| pMT197  | <i>attλ cat lacI P<sub>lac</sub>::yraP<sup>(1-191)</sup>-mCherry</i>                             | R6K        | This study          |

| Plasmid | Genotype <sup>a</sup>                                                                      | Origin    | Source or Reference |
|---------|--------------------------------------------------------------------------------------------|-----------|---------------------|
| pMT198  | <i>attλ cat lacI P<sub>lac</sub>::yraP<sup>(VA-20,21-DE)</sup></i>                         | R6K       | This study          |
| pMT199  | <i>attλ cat lacI P<sub>lac</sub>::yraP<sup>(VA-20,21-DE)</sup>-mCherry</i>                 | R6K       | This study          |
| pMT209  | <i>attλ cat lacI P<sub>lac</sub>::<sup>ss</sup>dsbA-yraP<sup>(24-191)</sup></i>            | R6K       | This study          |
| pMT210  | <i>attλ cat lacI P<sub>lac</sub>::<sup>ss</sup>dsbA-yraP<sup>(24-191)</sup>-mCherry</i>    | R6K       | This study          |
| pMT224  | <i>bla araC P<sub>ara</sub>::sulA</i>                                                      | pBR/ColE1 | This study          |
| pNP16   | <i>attHK022 tetA tetR lacI<sup>q</sup> P<sub>lac-m3</sub>::amiC-GFP</i>                    | R6K       | [5]                 |
| pNP20   | <i>attHK022 tetA tetR lacI<sup>q</sup> P<sub>lac</sub>::nlpD<sup>(1-379)</sup>-mCherry</i> | R6K       | [5]                 |
| pTB102  | <i>cat repA(ts) cl857(ts) P<sub>λR</sub>::int(HK022)</i>                                   | pSC101    | [10]                |
| pTU119  | <i>bla lacI<sup>q</sup> P<sub>T7</sub>::h-sumo-nlpD<sup>(27-379)</sup></i>                 | pBR/ColE1 | [11]                |

<sup>a</sup> P<sub>ara</sub>, P<sub>λR</sub>, and P<sub>lac</sub> indicate the arabinose, λR, and lactose promoters, respectively. P<sub>lac-m3</sub> is a *lac* promoter derivative with TATATT as its -10 element. <sup>ss</sup>*dsbA* corresponds to the first 24 codons of *dsbA* encoding its export signal to the periplasm. Scel indicates the presence of a substrate site for the I-SceI homing endonuclease. Numbers in superscript parenthesis indicate the amino acids included in the relevant clones. Unless indicated, the ribosome binding site (RBS) used for all constructs is the strong RBS of phage T7 φ10 gene. Additionally, all mCherry fusion proteins contain a LEGPAGL peptide linker between the NlpD variant and mCherry protein.
